# Supplementary material for: LRP10, PGK1 and RPLP0: Best Reference Genes in Periprostatic Adipose Tissue under Obesity and Prostate Cancer Conditions
Source: MDPI journal article supplement (doi:10.3390/ijms242015140), 2023-10-13
Supplement: s1 [file s1]

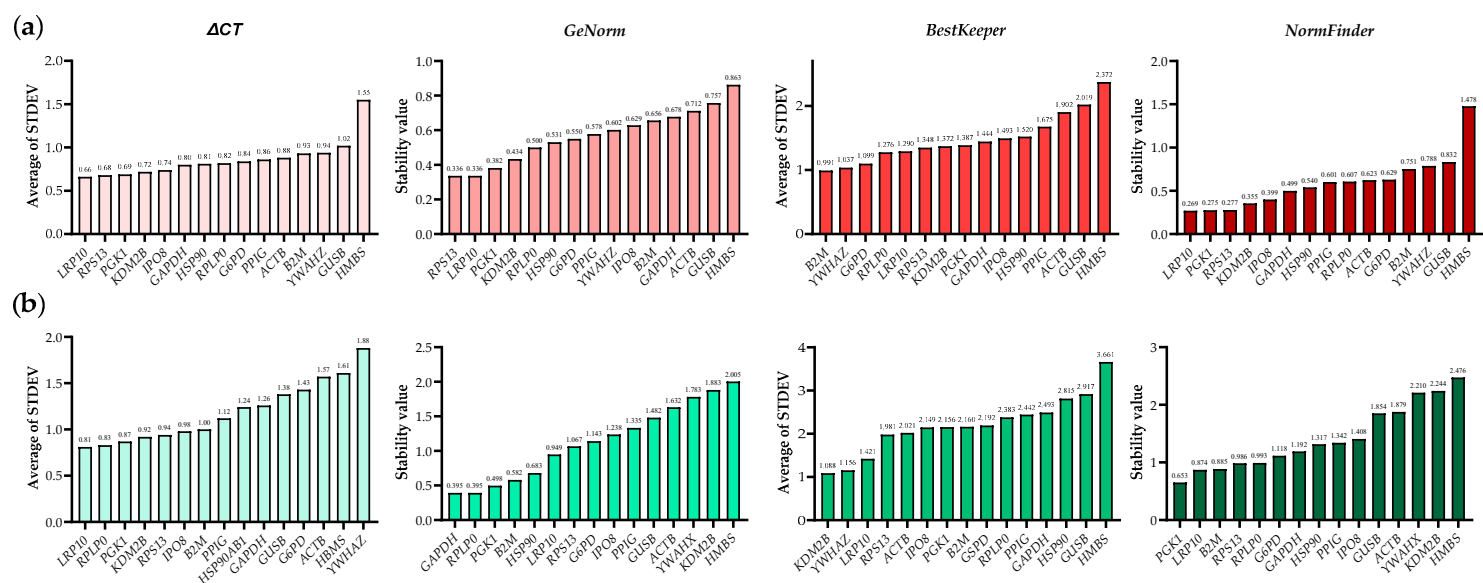

**Figure S2.**  $\Delta CT$  method, GeNorm, BestKeeper, and NormFinder specific suitability parameters. Specific software parameters were calculated for 15 internal reference genes evaluated by: (a) RT-qPCR; and, (b) microfluidic-based qPCR array methodology.
