# Supplementary material for: LRP10, PGK1 and RPLP0: Best Reference Genes in Periprostatic Adipose Tissue under Obesity and Prostate Cancer Conditions
Source: MDPI journal article supplement (doi:10.3390/ijms242015140), 2023-10-13
Supplement: s1 [file s1]

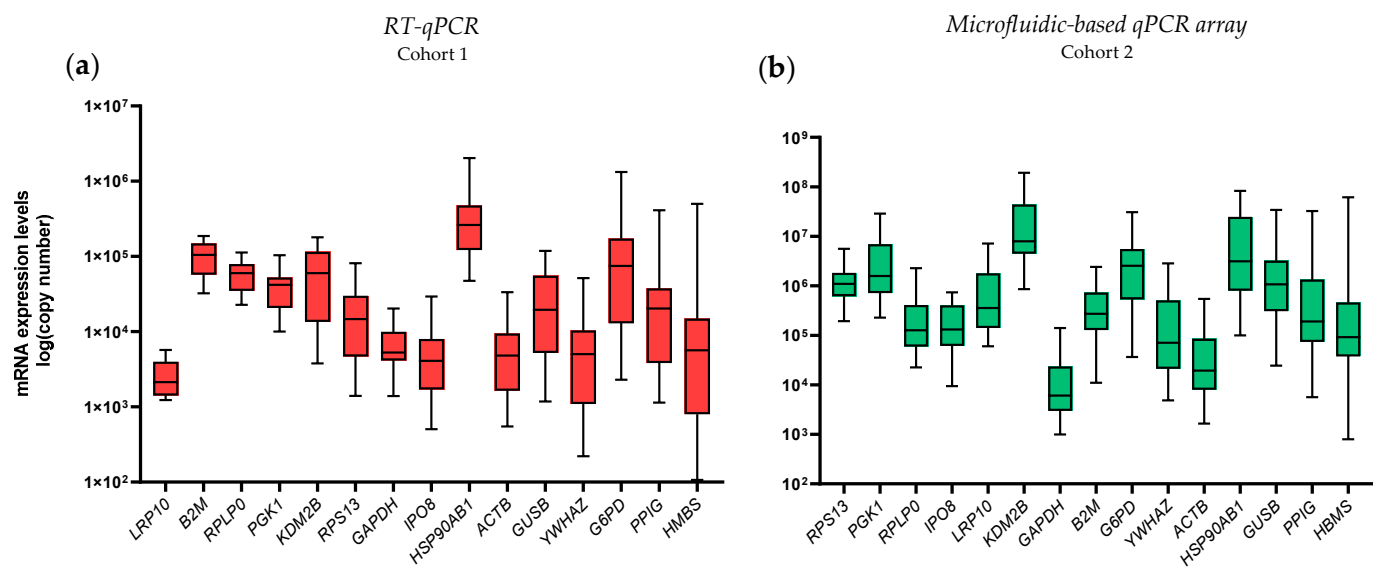

**Figure S1.** Absolute mRNA copy number levels of 15 evaluated internal reference genes in human PPATs. Data (Mean  $\pm$  SD of copy number) obtained by RT-qPCR technique (a), or microfluidic-based qPCR array technique (b). Standard curves for each selected gen were run in parallel to quantify the absolute mRNA copy number across the samples used.
