# Supplementary material for: LRP10, PGK1 and RPLP0: Best Reference Genes in Periprostatic Adipose Tissue under Obesity and Prostate Cancer Conditions
Source: MDPI journal article supplement (doi:10.3390/ijms242015140), 2023-10-13
Supplement: s1 [file s1]

**Table S2.** Gene symbol, primers sequences, Amplicon Size (A.S.), official name, and function of validation measured genes.

| GENE          | SEQUENCE                                       | A.S (BP) | OFFICIAL NAME                 | FUNCTION                                                                                     |
|---------------|------------------------------------------------|----------|-------------------------------|----------------------------------------------------------------------------------------------|
| <i>LEP</i>    | GGTGACTTTCTGTTTGGAGGAG<br>GTGGCTTTGGCCCTATCTTT | 142      | Leptin                        | Adipocyte-secreted cytokine that plays a major role in the regulation of energy homeostasis  |
| <i>ANGPT1</i> | GAAGGGAACCGAGCCTATTC<br>TTTTCCTGCTGTCCCAGTGT   | 102      | Angiopoietin 1                | Member of a glycoprotein family involved in vascular development and angiogenesis            |
| <i>MMP2</i>   | CTACGATGGAGGCGCTAATG<br>ACTCTTTGTCCGTTTGGGG    | 150      | Matrix<br>Metalloproteinase 2 | Gelatinase A, type IV collagenase enzyme capable of cleaving extracellular matrix components |
| <i>MMP9</i>   | CAGTGCCATGTAAATCCCCA<br>CACCTCCACTCCTCCCTTC    | 102      | Matrix<br>Metalloproteinase 9 | Extracellular matrix remodeling enzyme that degrades type IV and V collagens                 |
