# Supplementary material for: LRP10, PGK1 and RPLP0: Best Reference Genes in Periprostatic Adipose Tissue under Obesity and Prostate Cancer Conditions
Source: MDPI journal article supplement (doi:10.3390/ijms242015140), 2023-10-13
Supplement: s1 [file s1]

**Table S1.** Statistical parameters for reference gene election across the evaluated battery of genes. SD (Standard Deviation; GN – GeNorm; BK – BestKeeper; NF – NormFinder).

| <b>Gene</b>     | <b>Method</b> | <b>Min</b> | <b>Max</b> | <b>Mean</b> | <b>SD</b> | <b>GN<sup>a</sup></b> | <b>BK<sup>b</sup></b> | <b>NF<sup>c</sup></b> |
|-----------------|---------------|------------|------------|-------------|-----------|-----------------------|-----------------------|-----------------------|
| <i>ACTB</i>     | RT-qPCR       | 17.01      | 26.11      | 21.54       | 2.15      | 0.712                 | 1.902                 | 0.623                 |
|                 | Mic-Array     | 14.84      | 26.11      | 19.71       | 2.80      | 1.632                 | 1.421                 | 1.879                 |
| <i>B2M</i>      | RT-qPCR       | 21.51      | 26.67      | 23.11       | 1.50      | 0.656                 | 0.991                 | 0.751                 |
|                 | Mic-Array     | 17.21      | 26.28      | 20.97       | 2.29      | 0.582                 | 2.16                  | 0.885                 |
| <i>G6PD</i>     | RT-qPCR       | 19.77      | 27.32      | 23.89       | 2.32      | 0.550                 | 1.099                 | 0.629                 |
|                 | Mic-Array     | 15.25      | 24.91      | 19.29       | 2.43      | 1.143                 | 2.192                 | 1.118                 |
| <i>GAPDH</i>    | RT-qPCR       | 21.88      | 28.79      | 24.45       | 1.87      | 0.678                 | 1.444                 | 0.499                 |
|                 | Mic-Array     | 18.71      | 26.81      | 23.33       | 2.26      | 0.395                 | 2.493                 | 1.192                 |
| <i>GUSB</i>     | RT-qPCR       | 26.44      | 33.61      | 29.54       | 2.16      | 0.757                 | 2.019                 | 0.832                 |
|                 | Mic-Array     | 17.63      | 28.89      | 22.92       | 3.01      | 1.482                 | 2.917                 | 1.854                 |
| <i>HMBS</i>     | RT-qPCR       | 21.64      | 34.57      | 29.02       | 3.17      | 0.863                 | 2.372                 | 1.478                 |
|                 | Mic-Array     | 14.27      | 31.49      | 23.73       | 3.46      | 2.005                 | 3.661                 | 2.476                 |
| <i>HSP90AB1</i> | RT-qPCR       | 18.86      | 26.52      | 23.65       | 2.06      | 0.531                 | 1.52                  | 0.540                 |
|                 | Mic-Array     | 15.38      | 25.40      | 20.02       | 2.91      | 0.683                 | 2.815                 | 1.317                 |
| <i>IPO8</i>     | RT-qPCR       | 27.16      | 33.41      | 30.43       | 1.92      | 0.629                 | 1.493                 | 0.399                 |
|                 | Mic-Array     | 22.19      | 28.90      | 25.01       | 2.02      | 1.238                 | 2.149                 | 1.408                 |
| <i>KDM2B</i>    | RT-qPCR       | 29.62      | 35.3       | 31.66       | 1.78      | 0.434                 | 1.372                 | 0.355                 |
|                 | Mic-Array     | 19.36      | 27.32      | 23.40       | 2.20      | 1.883                 | 1.088                 | 2.244                 |
| <i>LRP10</i>    | RT-qPCR       | 25.73      | 30.72      | 27.99       | 1.47      | 0.336                 | 1.290                 | 0.269                 |
|                 | Mic-Array     | 16.01      | 22.98      | 19.84       | 2.17      | 0.949                 | 2.021                 | 0.874                 |
| <i>PGK1</i>     | RT-qPCR       | 23.78      | 29.73      | 26.64       | 1.76      | 0.382                 | 1.387                 | 0.275                 |
|                 | Mic-Array     | 16.36      | 23.47      | 20.19       | 1.99      | 0.498                 | 2.156                 | 0.653                 |
| <i>PPIG</i>     | RT-qPCR       | 24.76      | 34.04      | 30.17       | 2.61      | 0.578                 | 1.675                 | 0.601                 |
|                 | Mic-Array     | 17.88      | 28.57      | 24.78       | 3.03      | 1.335                 | 2.442                 | 1.342                 |
| <i>RPLP0</i>    | RT-qPCR       | 23.36      | 28.97      | 25.97       | 1.71      | 0.501                 | 1.276                 | 0.607                 |
|                 | Mic-Array     | 14.36      | 21.41      | 18.42       | 2.01      | 0.395                 | 2.383                 | 0.993                 |
| <i>RPS13</i>    | RT-qPCR       | 22.65      | 28.9       | 25.58       | 1.81      | 0.336                 | 1.348                 | 0.277                 |
|                 | Mic-Array     | 16.13      | 23.74      | 19.21       | 1.91      | 1.067                 | 1.981                 | 0.986                 |
| <i>YWHAZ</i>    | RT-qPCR       | 24.16      | 30.93      | 26.73       | 2.21      | 0.602                 | 1.037                 | 0.788                 |
|                 | Mic-Array     | 18.13      | 26.01      | 21.60       | 2.48      | 1.783                 | 1.156                 | 2.21                  |

<sup>a</sup> Expression stability value M

<sup>b</sup> Cq standard deviation

<sup>c</sup> Expression stability value
